1        **Understanding population structure in an evolutionary context:**

2                    **population-specific  $F_{ST}$  and pairwise  $F_{ST}$**

3

4                    Short running title: **Integrated  $F_{ST}$  population structure**

5

6

7                    Shuichi Kitada<sup>1</sup>, Reiichiro Nakamichi<sup>2</sup>, and Hirohisa Kishino<sup>3</sup>

8

9

10    1 Tokyo University of Marine Science and Technology, Tokyo 108-8477, Japan

11    2 Japan Fisheries Research and Education Agency, Yokohama 236-8648, Japan

12    3 Graduate School of Agriculture and Life Sciences, The University of Tokyo, Tokyo

13    113-8657, Japan

14

15

16    Corresponding:

17    Shuichi Kitada,

18    Tokyo University of Marine Science and Technology, Minato-ku, Tokyo 108-8477,

19    Japan

20    +81-297-45-5267

21    [kitada@kaiyodai.ac.jp](mailto:kitada@kaiyodai.ac.jp)

## 22 **Abstract**

23 Populations are shaped by their history. Therefore, it is crucial to interpret population  
24 structure in an evolutionary context. Wright's  $F_{ST}$  measures current population structure,  
25 whereas population-specific  $F_{ST}$  measures deviation from the ancestral population. To  
26 understand current population structure and a population's history of range expansion, we  
27 propose a novel representation method that overlays population-specific  $F_{ST}$  estimates on an  
28 unrooted neighbor-joining tree inferred from a pairwise  $F_{ST}$  distance matrix and on a map of  
29 sampling locations. We examined the usefulness of our procedure by conducting simulations  
30 that mimicked population colonization from an ancestral population and analyzing published  
31 human, Atlantic cod, and wild poplar genotype data sets. Our results demonstrated that  
32 population-specific  $F_{ST}$  values identify the source population and trace the evolutionary  
33 history of its derived populations based on genetic diversity. In contrast, pairwise  $F_{ST}$  values  
34 represent the current population structure. By integrating results of both estimators, we  
35 obtained a new picture of current population structure that incorporates evolutionary history.  
36 The generalized least squares of genome-wide population-specific  $F_{ST}$  indicated that the wild  
37 poplar population expanded its distribution to the north where it adapted to longer day  
38 lengths, to seashores where it adapted to abundant rainfall, and to the south where it adapted  
39 to dry summers. Genomic data highlight the power of the bias-corrected moment estimators  
40 of  $F_{ST}$ . All  $F_{ST}$  moment estimators described in this paper have reasonable CPU times and are  
41 useful in population genomics studies. The R codes for our representation method and  
42 simulations are available in the Supporting Information.

43

## 44 **Keywords:**

45 Adaptation, evolution, genetic diversity, migration, population structure

## 46 **1 | INTRODUCTION**

47 Quantifying genetic relationships among populations is of substantial interest in population  
48 biology, ecology, and human genetics (Weir & Hill, 2002). Appropriate estimates of  
49 population structure are the basis of our understanding of biology and biological applications,  
50 which vary from evolutionary and conservation studies to association mapping and forensic  
51 identification (Weir & Hill, 2002; Weir & Goudet, 2017). For such objectives, Wright's  $F_{ST}$   
52 (Wright, 1951) is commonly used to quantify the genetic divergence of populations and there  
53 are many informative reviews on traditional and population-specific  $F_{ST}$  estimators (*e.g.*,  
54 Excoffier, 2001; Rousset, 2001, 2004; Balloux & Lugon-Moulin, 2002; Weir & Hill, 2002;  
55 Beaumont, 2005; Holsinger & Weir, 2009; Gaggiotti & Foll, 2010; Bhatia et al., 2013; Weir  
56 and Goudet, 2017). Because inferences include methods of moment, maximum likelihood and  
57 Bayesian estimation, those reviews tended to focus on theoretical perspectives. Therefore,  
58 these issues are well understood, particularly among statistical and theoretical population  
59 geneticists. Although population-specific  $F_{ST}$  is expected to have a wide range of applications  
60 (Weir and Goudet, 2017), there have been no formal comparative studies that describe their  
61 differences between traditional and population-specific  $F_{ST}$  estimators, and how they scale-up  
62 to genomic data is not known. Software has not been provided for the population-specific  $F_{ST}$   
63 moment estimator, which makes it difficult biologists to this approach.

64

65 In this study, we propose a novel representation that overlays genome-wide population-  
66 specific and pairwise  $F_{ST}$  estimates (average over loci) to understand population structure in  
67 an evolutionary context. We visualized current population structure on a clustering tree and on  
68 a map of sampling locations based on the two different  $F_{ST}$  estimates. The environment  
69 experienced by the population under range expansion was estimated by the generalized least

70 squares (GLS) of genome-wide population-specific  $F_{ST}$ , which takes into account residual  
71 correlation due to population structure. We demonstrated the usefulness of our procedure by  
72 conducting simulations that mimicked population colonization from a single ancestral  
73 population, and we applied this procedure to published genotype data sets of humans, Atlantic  
74 cod, and wild poplar.

75

76 We chose 377 microsatellite genotypes collected from human populations worldwide as the  
77 first empirical data, because their evolutionary history, migration, and population structure has  
78 been best studied (*e.g.*, Diamond, 1997; Rosenberg et al., 2002; Ramachandran et al., 2005;  
79 Liu et al., 2006; Rutherford, 2016; Nielsen et al., 2017). Because the results are well known  
80 by statistical/theoretical population geneticists and biologists, our new integrative  $F_{ST}$  analysis  
81 on this data set could provide a good example of the usefulness of our new approach. A  
82 single-nucleotide polymorphism (SNP) data set was obtained from a commercially important  
83 fish, Atlantic cod (*Gadus morhua*), in the North Atlantic. The genotype data of 924 SNPs  
84 were combined from two data sets, which included historical samples collected 50–80 years  
85 ago and contemporary samples from the northern range margin of the species in Greenland,  
86 Norway, and the Baltic Sea. The inclusion of both types of data might facilitate detection of  
87 migration history of this highly migratory marine fish in a warming climate. The other SNP  
88 data set was from a tree, wild poplar (*Populus trichocarpa*), in the American Pacific  
89 Northwest. The samples were collected under different environmental conditions over an area  
90 of 2,500 km near the Canadian–US border along with various environmental data and are thus  
91 possibly useful for detecting environmental effects on population structure. The poplar data  
92 contained 29,355 SNPs, and the corresponding CPU processing time will provide a practical  
93 measure for scaling-up to genomic data. All  $F_{ST}$  estimators were computed using the R

94 package FinePop2\_ver.0.2, which is available at CRAN. The R codes for our representation  
95 method of population structure and simulations of population colonization used in this study  
96 are available in the Supporting Information. This can be used for microsatellite and SNP  
97 genotype data, and accepts Genepop format (Raymond & Rousset, 1995; Rousset, 2008),  
98 which has been particularly widely used among biologists.

99

## 100 **2 | MATERIALS AND METHODS**

### 101 **2.1 | Understanding population structure in evolutionary context**

102 We integrated genome-wide population-specific and pairwise  $F_{ST}$  estimates (averaged over all  
103 loci) on an unrooted neighbor-joining (NJ) tree (Saitou & Nei, 1987) and on a map of  
104 sampling locations. We drew the NJ tree based on the distance matrix of genome-wide  
105 pairwise  $F_{ST}$  values (averaged over all loci) using the `nj` function in the R package `ape` and  
106 superimposed the magnitude of genome-wide population-specific  $F_{ST}$  values using a color  
107 gradient on the NJ tree based on `rgb(1 -  $F_{ST,0}$ , 0,  $F_{ST,0}$ )`, where  $F_{ST,0} = (F_{ST} -$   
108  $\min F_{ST}) / (\max F_{ST} - \min F_{ST})$ . This conversion represents the standardized magnitude of a  
109 population-specific  $F_{ST}$  value at the sampling point, with colors between blue (for the largest  
110  $F_{ST}$ ) and red (smallest  $F_{ST}$ ). The  $F_{ST}$  maps were drawn using the `sf` package in R, where  
111 sampling locations were plotted based on the longitudes and latitudes; they were visualized by  
112 the population-specific  $F_{ST}$  color gradient, and the size of each sampling point was  
113 proportional to the expected heterozygosity ( $H_e$ ). Sampling points with pairwise  $F_{ST}$  values  
114 smaller than a given threshold were connected by lines to visualize the image of gene flow  
115 between populations. The R codes for the representation method of population structure for  
116 the human data set are given in the Supporting Information.

117

## 118 **2.2 | Inferring environmental selection from observed population structure**

119 To infer the geography and environment that were experienced by the population range  
120 expansion, we regressed the genome-wide population-specific  $F_{ST}$  values on the geographical  
121 and environmental variables. Residuals are correlated because of population structure;  
122 therefore, the effective sample size is lower than the actual sample size. In such  
123 circumstances, ordinary least squares overestimates the precision. To take the correlation into  
124 account, we used GLS with the `GLS` function in `FinePop2_ver.0.2`. We derived the  
125 components of the variance–covariance matrix  $\Omega$  for the `GLS` function as follows. The  
126 population-specific  $F_{ST}$  estimator can be written as  $ps\hat{F}_{ST}^i = \frac{\bar{y}^i}{\bar{x}}$ . Using the Taylor series  
127 expansion for the first term, we inferred the asymptotic variance as

$$128 \quad V[ps\hat{F}_{ST}^i] \simeq \frac{\bar{y}^2}{\bar{x}^2} \left\{ \frac{V[\bar{x}]}{\bar{x}^2} + \frac{V[\bar{y}^i]}{\bar{y}^i{}^2} - \frac{2Cov[\bar{x}, \bar{y}^i]}{\bar{x}\bar{y}^i} \right\} \quad (1)$$

129 Similarly, the asymptotic covariances between population-specific  $F_{ST}$  values of  $i, j$   
130 populations were obtained by

$$131 \quad Cov[ps\hat{F}_{ST}^i, ps\hat{F}_{ST}^j] \simeq \frac{\bar{y}^i\bar{y}^j}{\bar{x}^4} V[\bar{x}] - \frac{\bar{y}^i}{\bar{x}^3} Cov[\bar{x}, \bar{y}^j] - \frac{\bar{y}^j}{\bar{x}^3} Cov[\bar{x}, \bar{y}^i], \quad (2)$$

132 where the variance and covariance components were calculated by

$$133 \quad V[\bar{x}] = \frac{1}{L(L-1)} \sum_{l=1}^L (x_l - \bar{x})^2, \quad V[\bar{y}^i] = \frac{1}{L(L-1)} \sum_{l=1}^L (y_l^i - \bar{y}^i)^2,$$

$$134 \quad Cov[\bar{x}, \bar{y}^i] = \frac{1}{L(L-1)} \sum_{l=1}^L (x_l - \bar{x})(y_l^i - \bar{y}^i) \quad \text{and}$$

$$135 \quad Cov[\bar{x}, \bar{y}^j] = \frac{1}{L(L-1)} \sum_{l=1}^L (x_l - \bar{x})(y_l^j - \bar{y}^j).$$

136 This analysis was performed on the wild poplar data set, for which 11  
137 environmental/geographical parameters were available for each sampling location. Once the  
138 key factors that are associated with the population range expansion are identified, it would be  
139 interesting to search for the crucial genes that enabled adaptation to the local environment by

140 determining outliers of locus-specific, population-specific  $F_{ST}$  values (Foll & Gaggiotti, 2008;  
141 Coop et al., 2010).

142

### 143 **2.3 | Applied $F_{ST}$ estimators**

144 Throughout this paper, notations consistent with those of Weir & Hill (2002) were used:  $i$  for  
145 populations ( $i = 1, \dots, r$ ),  $u$  for alleles ( $u = 1, \dots, m$ ), and  $l$  for loci ( $l = 1, \dots, L$ ). We used  
146 WG population-specific  $F_{ST}$  moment estimators, because we expected that population-specific  
147  $F_{ST}$  values reflect population history (Weir & Goudet, 2017). In our analyses, we extended  
148 WG population-specific  $F_{ST}$  estimator to overall loci (genome-wide population-specific  $F_{ST}$ ),  
149 and the combined ratio estimator (Cochran, 1977) for overall loci (Buckleton et al. 2016) was:

$$150 \quad \text{ps}\hat{F}_{ST}^i = \frac{\sum_{l=1}^L (\tilde{M}_{W,l}^i - \tilde{M}_l^B)}{\sum_{l=1}^L (1 - \tilde{M}_l^B)}, \quad (3)$$

151 where  $\tilde{M}_W^i$  is the unbiased within-population matching of two distinct alleles of population  $i$ ,  
152 and  $\tilde{M}^B$  is the between-population-pair matching average over pairs of populations  $i, i'$   
153 (Supplemental Note). This is called the “ratio of averages”  $F_{ST}$  estimator, which  
154 asymptotically converges to unbiased estimates of  $F_{ST}$  as the number of independent SNPs  
155 increases (Weir & Cockerham, 1984; Weir & Hill, 2002; Bhatia et al., 2013).

156

157 We applied empirical (Beaumont & Balding, 2004) and full Bayesian (Foll & Gaggiotti,  
158 2006) population-specific  $F_{ST}$  estimators. Beaumont & Balding (2004) maximized the  
159 Dirichlet-multinomial marginal likelihood in their Equation 1 and estimated  $\theta_{li}$ :

$$160 \quad L_{li}(\theta_{li} | n_{li1}, \dots, n_{lim_l}) = \frac{\Gamma(\theta_{li})}{\Gamma(N_{li} + \theta_{li})} \prod_{u=1}^{m_l} \frac{\Gamma(n_{liu} + \theta_{li}\bar{p}_{lu})}{\Gamma(\theta_{li}\bar{p}_{lu})}. \quad (4)$$

161 Here,  $\theta_{li}$  is the scale parameter of the Dirichlet prior distribution for locus  $l$  and population  $i$ ,

162  $\tilde{p}_{lu}$  is the observed frequency of allele  $u$  at locus  $l$ ,  $n_{liu}$  is the observed allele count in  
163 population  $i$ , and  $N_{li}$  is the total number of alleles. Importantly,  $\bar{p}_{lu}$  is the mean allele  
164 frequency over all subpopulations, whereas  $\theta_{li}\bar{p}_{lu} = \alpha_{liu}$ , where  $\theta_{li} = \sum_{u=1}^{m_l} \alpha_{liu}$ . The  
165 parametrization reduces the number of parameters to be estimated. Based on a Dirichlet  
166 (multi-allelic) and/or a beta (bi-allelic) scale parameter, population-specific  $F_{ST}$  values were  
167 estimated for each locus using the following function of  $\hat{\theta}_{li}$  (Beaumont & Balding, 2004):

$$168 \quad \text{ps}\tilde{F}_{ST,l}^i = \frac{1}{\hat{\theta}_{li} + 1}. \quad (5)$$

169  
170 We used Nei & Chesser's (1983) bias-corrected  $G_{ST}$  moment estimator (NC83) to estimate  
171 pairwise  $F_{ST}$  over loci in our analysis:

$$172 \quad \text{pw}\hat{F}_{ST} = \frac{\sum_{l=1}^L (\hat{H}_{T,l} - \hat{H}_{S,l})}{\sum_{l=1}^L \hat{H}_{T,l}}, \quad (6)$$

173 where  $\hat{H}_T$  and  $\hat{H}_S$  are the unbiased estimators of total and within-population heterozygosity,  
174 respectively (Supplemental Note).  $G_{ST}$  (Nei, 1973) is defined "by using the gene frequencies  
175 at the present population, so that no assumption is required about the pedigrees of individuals,  
176 selection, and migration in the past" (Nei, 1977).  $G_{ST}$  assumes no evolutionary history  
177 (Holsinger & Weir, 2009), whereas NC83 does not consider any population replicates (Weir &  
178 Cockerham, 1984; Excoffier, 2001). The pairwise  $F_{ST}$  values obtained from NC83 therefore  
179 measured current population structures based on a fixed set of samples of subpopulations. Our  
180 previous coalescent simulations demonstrated that NC83 performs the best among  $F_{ST}$   
181 estimators when estimating pairwise  $F_{ST}$  values, particularly for larger numbers of loci  
182 (Kitada et al., 2017).

183

## 184 **2.4 | Computing $F_{ST}$ values**



185 We converted the genotype data into Genepop format (Raymond & Rousset, 1995; Rousset,  
186 2008) for implementation in the R package FinePop2\_ver.0.2. We applied the bias-corrected  
187 population-specific  $F_{ST}$  moment estimator (Weir & Goudet, 2017) (WG). Genome-wide WG  
188 population-specific  $F_{ST}$  (Equation 3) values were computed using the `pop_specificFST`  
189 function. In addition to the “ratio of averages” (Weir & Cockerham, 1984; Weir & Hill, 2002)  
190 used for the  $F_{ST}$  functions in FinePop2\_ver.0.2, we computed the “average of ratios” (Bhatia  
191 et al., 2013) of the WG population-specific  $F_{ST}$  for human data for comparison by averaging  
192 locus-specific, population-specific  $F_{ST}$  values over loci. We maximized Equation 4 and  
193 estimated the empirical Bayesian population-specific  $F_{ST}$  (Beaumont & Balding, 2004) at  
194 each locus according to Equation 5. We then averaged these values over all loci. For the full  
195 Bayesian model, GESTE\_ver. 2.0 (Foll & Gaggiotti, 2006) was used to compute genome-  
196 wide population-specific  $F_{ST}$  values.  $F_{ST}$  is equal to  $G_{ST}$  for diploid random mating  
197 populations (Excoffier, 2001; also see Supplemental Note); therefore, pairwise  $F_{ST}$  values  
198 based on Nei & Chesser’s bias corrected  $G_{ST}$  (1983) (NC83, Equation 6) were computed  
199 using the `pop_pairwiseFST` function in FinePop2\_ver.0.2. Expected heterozygosity was  
200 calculated for each population with the `read.GENEPOP` function.

201

## 202 **2.5 | Simulations of population colonization**

203 To test the performance of our representation method, we conducted simulations that  
204 mimicked colonization of populations from a single ancestral population (population 1). We  
205 modeled three types of colonization, one- (Figure S1a), two-, and three-directional population  
206 expansion (Figure 1a, d), with 24 demes (populations 2–25). We set the effective population  
207 size of the ancestral population of  $N_e = 10^5$  (twice the number of individuals in diploid  
208 organisms in a random mating population). At the beginning of colonization, 1% of  $N_e$

209 migrated into the adjacent vacant habitat once every 10 generations. The effective population  
210 size of the newly derived population increased to  $N_e = 10^4$  after one generation, and the  
211 populations exchanged 1% of  $N_e$  genes with adjacent population(s) in every generation. Like  
212 the ancestral population, 1% of  $N_e$  individuals migrated into the adjacent vacant habitat once  
213 every 10 generations. We simulated the allele frequencies of SNPs in the ancestral and 24  
214 derived populations.

215

216 The initial allele frequencies in the ancestral population,  $q$ , at 100,000 neutral SNP loci were  
217 generated from the predictive equilibrium distribution,  $f(q) \propto q^{-1}(1 - q)^{-1}$  (Wright 1931).  
218 Additionally, 10 newly derived SNPs were introduced to each existing population in each  
219 generation. Therefore, in total, 35,100 SNPs were generated. When a new SNP emerged in a  
220 population, we set the initial allele frequency of the newly derived SNP to 0.01 in the  
221 population and 0 in the other populations. This mimicked new mutations that survived at the  
222 initial phase after their birth. These 100,000 ancestral SNPs and 35,100 newly derived SNPs  
223 were considered “unobserved.” The allele frequencies of these SNPs were changed by random  
224 drift under a binomial distribution in every generation. Many of the SNPs had reduced  
225 frequencies of the derived allele over generations and lost their polymorphism. After 260  
226 generations, SNPs that retained their polymorphism were randomly selected as “observed”  
227 SNPs. In this simulation, we selected 10,000 ancestral SNPs and 500 newly derived SNPs.  
228 Then, we generated 50 individuals for each population. Genotypes of these 10,500 SNPs were  
229 randomly generated for each individual following the allele frequencies in the population to  
230 which each individual belongs. Thus, we obtained “observed” genotypes of 1,250 individuals  
231 (= 50 individuals  $\times$  25 populations) at 10,500 SNP loci (10,000 ancestral SNPs + 500 newly  
232 derived SNPs by mutation). We converted the simulated genotypes into Genepop format

233 (Raymond & Rousset, 1995; Rousset, 2008). We computed genome-wide population-specific  
234  $F_{ST}$  and pairwise  $F_{ST}$  values between 25 populations and overlaid genome-wide population-  
235 specific  $F_{ST}$  values on the unrooted NJ tree, as described in 2.1. The R codes for the  
236 simulations are available in the Supporting Information.

237

## 238 **2.6 | Empirical data sets**

239 The human microsatellite data in Rosenberg et al. (2002) were retrieved from  
240 <https://web.stanford.edu/group/rosenberglab/index.html>. We converted the data to Genepop  
241 format (Raymond & Rousset, 1995; Rousset, 2008). We removed the Surui sample (Brazil)  
242 from the data because that population was reduced to 34 individuals in 1961 as a result of  
243 introduced diseases (Liu et al., 2006). We retained genotype data ( $n = 1,035$ ) of 377  
244 microsatellite loci from 51 populations categorized into six groups as in the original study: 6  
245 populations from Africa, 12 from the Middle East and Europe, 9 from Central/South Asia, 18  
246 from East Asia, 2 from Oceania, and 4 from America. Longitudes and latitudes of the  
247 sampling sites were obtained from Cann et al. (2002).

248

249 The Atlantic cod SNP genotype data of 924 markers common to 29 populations reported in  
250 Therkildsen et al. (2013a, b) and 12 populations in Hemmer - Hansen et al. (2013a, b) were  
251 combined. We compared genotypes associated with each marker in samples that were  
252 identical between the two studies, namely, CAN08 and Western\_Atlantic\_2008, ISO02 and  
253 Iceland\_migratory\_2002, and ISC02 and Iceland\_stationary\_2002, and standardized the gene  
254 codes. We removed cgpGmo.S1035, whose genotypes were inconsistent between the two  
255 studies. We also removed cgpGmo.S1408 and cgpGmo.S893, for which genotypes were  
256 missing in several population samples in Therkildsen et al. (2013b). Temporal replicates in

257 Norway migratory, Norway stationary, North Sea, and Baltic Sea samples were removed for  
258 simplicity. The final data set consisted of genotype data ( $n = 1,065$ ) at 921 SNPs from 34  
259 populations: 3 from Iceland, 25 from Greenland, 3 from Norway, and 1 each from Canada, the  
260 North Sea, and the Baltic Sea. Two ecotypes (migratory and stationary) that were able to  
261 interbreed but were genetically differentiated (Hemmer - Hansen et al., 2013a; Berg et al.,  
262 2016) were included in the Norway and Iceland samples. All individuals in the samples were  
263 adults, and most were mature (Therkildsen et al., 2013a). The longitudes and latitudes of the  
264 sampling sites in Hemmer - Hansen et al. (2013a) were used. For the data from Therkildsen et  
265 al. (2013a), approximate sampling points were estimated from the map of the original study,  
266 and longitudes and latitudes were recorded.

267  
268 Wild poplar SNP genotype data and environmental/geographical data were retrieved from the  
269 original studies of McKown et al. (2014a, b). The genotype data contained 29,355 SNPs of  
270 3,518 genes of wild poplar ( $n = 441$ ) collected from 25 drainage areas (McKown et al.,  
271 2014c). Details of array development and selection of SNPs are provided in Geraldès et al.  
272 (2011, 2013). We converted the data to Genepop format (Raymond & Rousset, 1995; Rousset,  
273 2008). The samples covered various regions over a range of 2,500 km near the Canadian–US  
274 border at altitudes between 0 and 800 m (Supplemental Data). A breakdown of the 25  
275 drainages (hereafter, subpopulations) is as follows: 9 in northern British Columbia (NBC), 2  
276 in inland British Columbia (IBC), 12 in southern British Columbia (SBC), and 2 in Oregon  
277 (ORE) (Geraldès et al., 2014). The original names of clusters and population numbers were  
278 combined and used for our population labels (NBC1, NBC3, ..., ORE30). Each sampling  
279 location was associated with 11 environmental/geographical parameters: latitude (lat),  
280 longitude (lon), altitude (alt), longest day length (DAY), frost-free days (FFD), mean annual

281 temperature (MAT), mean warmest month temperature (MWMT), mean annual precipitation  
282 (MAP), mean summer precipitation (MSP), annual heat–moisture index (AHM), and summer  
283 heat-moisture index (SHM) (Supplemental Data). The AHM was calculated in the original  
284 study as  $(MAT+10)/(MAP/1000)$ ; a large AHM indicates extremely dry conditions.

285

## 286 **3 | RESULTS**

### 287 **3.1 | Simulations of population colonization**

288 In the one-directional simulation, our method correctly identified the ancestral population  
289 with the highest genetic diversity, and populations were located in order from 1 to 25 on the  
290 NJ tree (Figure S1b). In the two-directional simulation, our method correctly identified the  
291 ancestral population and detected that populations were split at population 9 and expanded in  
292 two directions, which was consistent with the simulation scenario (Figure 1b). In the three-  
293 directional simulation, the ancestral population was closely located to the adjacent  
294 populations 2, 9, and 17, but correctly detected three directions, as in the other simulations  
295 (Figure 1e).

296

297 Our simulation results demonstrated that our method represents new insight into current  
298 population structure that incorporates evolutionary history. Our results revealed that WG  
299 population-specific  $F_{ST}$  values (standardized by a color gradient) identified the source  
300 population and traced the evolutionary history of its derived populations based on genetic  
301 diversity. In contrast, the NC83 pairwise  $F_{ST}$  estimator correctly estimated the current  
302 population structure. Genome-wide WG population-specific  $F_{ST}$  values were negative in the  
303 ancestral population and adjacent populations, and the phenomenon was particularly  
304 significant in the one- and two-directional models (Figures S1c, 1c), whereas slightly negative

305 population-specific  $F_{ST}$  values were obtained in the ancestral and adjacent populations in the  
306 three-directional model (Figures 1f). In contrast,  $H_e$  values were larger in the ancestral  
307 population in the one- and two-directional models than in the three-directional model, though  
308 the variation in  $H_e$  values was not substantial because of the relatively few generations (260)  
309 in the simulation compared with real data (Figures S1b, 1b, e). Our simulation results  
310 indicated that, when gene flow from other populations into the source population was limited,  
311 relatively large  $H_e$  could be maintained, which resulted in substantial negative population-  
312 specific  $F_{ST}$  values. Equation 3 calculates deviation of within-population heterozygosity  
313 ( $\hat{H}_{Si} = 1 - \tilde{M}_W^i$ ) from between-population heterozygosity based on all different population  
314 pairs ( $\hat{H}_B = 1 - \tilde{M}_l^B$ ). Thus, Equation 3 produces negative values of population-specific  $F_{ST}$   
315 in cases of  $\hat{H}_{Si} > \hat{H}_B$  (see Discussion 4.3).

316

### 317 **3.2 | Humans**

318 The ordinal NJ tree of pairwise  $F_{ST}$  values divided the populations into five clusters: 1) Africa,  
319 2) the Middle East, Europe, and Central/South Asia, 3) East Asia, 4) Oceania, and 5)  
320 Americas (Figure S2). The WG population-specific  $F_{ST}$  estimator (Supplemental Data)  
321 indicated that populations in Africa had the smallest  $F_{ST}$  values, followed by the Middle East,  
322 Central/South Asia, Europe, and East Asia. The NJ tree integrated with population-specific  
323  $F_{ST}$  values inferred that human populations originated from Bantu Kenyans (having the  
324 smallest  $F_{ST}$  value as shown in red) and expanded to Europe, Middle East, Central/South Asia,  
325 and East Asia (Figure 2a,b). The Kalash were isolated from Europe/Middle East and  
326 Central/South Asia populations. Middle/South American populations and  
327 Papuans/Melanesians diverged from Central/South Asian and East Asian populations. As  
328 indicated by sampling points with  $F_{ST}$  values below the 0.02 threshold, gene flow from Africa

329 was low. In contrast, gene flow was substantial within Eurasia but was much smaller than that  
330 inferred from Eurasia to Oceania and America (Figure 3). As illustrated by sampling point  
331 radii,  $H_e$  was high in Africa, the Middle East, Central/South Asia, Europe, and East Asia, but  
332 relatively small in Oceania and America. The Kalash were less heterozygous than other  
333 populations in Central/South Asia; there are approximately 4,000 individuals that live in  
334 isolation in the highlands of northwestern Pakistan (Rutherford, 2016), and they speak an  
335 Indo-European language (Rosenberg et al., 2002). The Karitiana in Brazil had the lowest  
336 heterozygosity.  $H_e$  was highest in Africa and lowest in South America.

337  
338 Bayesian population-specific  $F_{ST}$  values estimated using the methods of Beaumont & Balding  
339 (2004) and Foll & Gaggiotti (2006) were nearly identical; however, in African populations,  
340 they were higher than WG population-specific  $F_{ST}$  values (Figure S3). The distributions of  
341  $F_{ST}$  values obtained from the two Bayesian methods were very similar, with the smallest  $F_{ST}$   
342 values observed in the Middle East, Europe, and Central/South Asia (Supplemental Data). The  
343 “ratio of averages” and “average of ratios” of the WG population-specific  $F_{ST}$  estimator were  
344 almost identical in all populations for this data set (Figure S4).

345

### 346 **3.3 | Atlantic cod**

347 The populations were divided according to the ordinal NJ tree of the pairwise  $F_{ST}$  distance  
348 matrix into four large clusters: 1) Canada, 2) Greenland west coast, 3) Greenland east coast,  
349 Iceland, Norway, and 4) North and Baltic seas. Fjord populations (in purple) formed a sub-  
350 cluster within the Greenland west coast, and migratory (orange) and stationary (magenta)  
351 ecotypes also formed a sub-cluster (Figure S5). The lowest WG population-specific  $F_{ST}$  value  
352 was in Canada (Supplemental Data). Greenland west-coast populations (in green in Figure

353 S5) generally had small  $F_{ST}$  values. Fjord populations had relatively higher  $F_{ST}$  values.  $F_{ST}$   
354 values were much higher for populations in Iceland, Norway, and the North Sea. The  $F_{ST}$   
355 value was the highest for BAS0607 from the Baltic Sea. Our integrated NJ tree with  
356 population-specific  $F_{ST}$  values estimated that Atlantic cod originated from Canada (having the  
357 smallest  $F_{ST}$  value as shown in red), migrated to the west coast of Greenland, and then  
358 expanded their distribution to Iceland, Norway, the North Sea, and the Baltic Sea (Figures 4a,  
359 S6). They might migrate to find new habitat (carrying capacity), and individuals with genomic  
360 variation were able to adapt to changing environments and formed the current local  
361 populations. The evolutionary history of Atlantic cod populations was clearly visualized on a  
362 map (Figure 4b).  $H_e$  (indicated by circle radii) was very high in Canada and Greenland, low  
363 in other areas, and lowest in the Baltic Sea. Based on pairwise  $F_{ST}$  values between sampling  
364 points ( $< 0.02$  threshold), substantial gene flow was detected between Greenland, Iceland, and  
365 Norway. In contrast, gene flow was low from Canada and the North and Baltic seas.

366

### 367 **3.4 | Wild poplar**

368 The ordinal NJ tree based on pairwise  $F_{ST}$  distant matrix divided populations into three large  
369 clusters: 1) IBC, 2) SBC, 3) NBC, and 4) ORE (Figure S7). The population represented by  
370 sample ORE30 was isolated from ORE29. Population-specific  $F_{ST}$  values were lowest in  
371 SBC27, IBC15, and IBC16 (Supplemental Data). Samples collected from areas close to the  
372 SBC coast had higher population-specific  $F_{ST}$  values than other SBC samples. NBC samples  
373 had population-specific  $F_{ST}$  values similar to those of SBC. Among NBC samples, NBC8 had  
374 the smallest population-specific  $F_{ST}$ , and NBC5 had the highest value, followed by NBC6 and  
375 NBC7. Wild poplar could have expanded their distribution by their fluffy seeds being blown  
376 away by wind, and individuals that had genomic variation were able to adapt to local



377 environments, which formed current local populations. Our integrated NJ tree with  
378 population-specific  $F_{ST}$  values showed that wild poplar originated from Inner BC and  
379 expanded in three directions with environmental adaptation, namely, to the BC southern coast,  
380 northern BC and south-western Alaska, and Oregon (Figures 5a, S8).  $H_e$  was highest in  
381 SBC27, IBC15, and IBC16, and lowest in NBC5. WG population-specific  $F_{ST}$ -based  
382 visualization of wild-poplar evolutionary history (Figure 5b) revealed that SBC27, IBC15,  
383 and IBC16 had the smallest  $F_{ST}$  values (in red) and large  $H_e$ , whereas NBC5, NBC6, and  
384 SBC22 had the largest  $F_{ST}$  values (in blue) and lowest  $H_e$ . As inferred by pairwise  $F_{ST}$  values  
385 between sampling points connected by yellow lines ( $< 0.02$  threshold), substantial gene flow  
386 was observed among populations.

387

388 To avoid multicollinearity, we excluded seven out of 11 environmental variables that were  
389 significantly correlated with each other, namely, lat, lon, alt, FFD, MWMT, MSP, and AHM.  
390 Our GLS of genome-wide population-specific  $F_{ST}$  values on the four environmental variables  
391 (DAY, MAT, MAP, and SHM) indicated that DAY, MAP, and SHM were significant (Table 1).  
392 All estimates were positive, which indicated that higher population-specific  $F_{ST}$  values were  
393 expected for longer DAY (longer daylight time), higher MAP (abundant rain), and higher  
394 SHM (dry summers), and these values reflected directions of population expansion. The  
395 scatter plot of DAY and SHM (each population colored by the population-specific  $F_{ST}$  value)  
396 suggested three directions of population range expansion; the wild poplar that originated  
397 from IBC15 expanded its distribution to NBC, where it adapted to longer DAY; that which  
398 originated from SBC27 expanded to SBC seashores, where it adapted to lower SHM, and to  
399 ORE29 and ORE30, where it adapted to higher SHM (Figure 6a). This was consistent in the  
400 scatter plot of DAY and MAP, which demonstrated that the expansion in SBC could have

401 been facilitated by adaptation to higher MAP (Figure 6b).

402

### 403 **3.5 | CPU times**

404 Using a laptop computer with an Intel Core i7-8650U CPU, only 89.8 s of CPU time was  
405 required to compute WG population-specific  $F_{ST}$  estimates and SEs of wild poplar (29,355  
406 SNPs; 25 populations,  $n = 441$ ). Alternatively, 120.7 s was required to obtain pairwise  $F_{ST}$   
407 (NC83) between all population pairs. Based on the results, we may need 50 min to compute  
408 WG population-specific  $F_{ST}$  and 70 min to compute pairwise NC83  $F_{ST}$  estimates for 1  
409 million SNPs using this laptop. This computation could be much faster if we used a  
410 workstation.

411

## 412 **4 | DISCUSSION**

### 413 **4.1 | Population-specific $F_{ST}$ traced population history as reflected by genetic** 414 **diversity**

415 In our analysis, genome-wide WG population-specific  $F_{ST}$  values successfully illustrated  
416 human evolutionary history, and indicated that humans originated in Kenya, expanded from  
417 the Middle East into Europe and from Central/South Asia into East Asia, and then possibly  
418 migrated to Oceania and America (Figures 2, 3). Kenya is located just below Ethiopia, where  
419 the earliest anatomically modern humans were found from fossils (Nielsen et al., 2017). Our  
420 results are also in good agreement with the highest levels of genetic diversity being detected  
421 in Africa (Rosenberg et al., 2002), the relationship uncovered between genetic and geographic  
422 distance (Ramachandran et al., 2005), the shortest colonization route from East Africa (Liu et  
423 al., 2006), and major migrations inferred from genomic data (Nielsen et al., 2017). The  
424 genome-wide WG population-specific  $F_{ST}$  values are consistent with results obtained from 24

425 forensic STR markers (Buckleton et al., 2016). Our analysis identified a source population  
426 and traced the evolutionary history. Our two-directional simulation corresponded to the  
427 human data and supported the results of the analysis.

428

429 The Atlantic cod data also corresponded to our two-directional simulation. The evolutionary  
430 history of Atlantic cod was again clearly visualized (Figure 4). Our analysis indicated that  
431 Atlantic cod originated in Canada (CAN08). The population-specific  $F_{ST}$  value of CAN08  
432 was very small,  $-0.21 \pm 0.02$  (SE), which was caused by the highest  $H_e$  value (population-  
433 specific heterozygosity) of CAN08, which was much greater than  $1 - \tilde{M}_I^B$  (between  
434 population heterozygosity) in Equation 3 (Figure S9). This suggested that the population  
435 expansion of Atlantic cod began by minimal gene flow from Canada. They might have first  
436 expanded to the west coast of Greenland before spreading to Iceland, the North Sea, Norway,  
437 and the Baltic Sea. This result was consistent with genomic evidence that Atlantic cod inhabit  
438 both sides of the Atlantic Ocean and evolved from a common evolutionary origin (Berg et al.,  
439 2017). The migratory ecotypes characterized by deeper and more offshore habitats and long-  
440 distance migrations (Hemmer - Hansen et al., 2013a) may have played an important role in  
441 this expansion. In the original Atlantic cod study (Therkildsen et al., 2013a), strong  
442 differentiation of CAN08 was found at neutral markers, which prompted the authors to  
443 suggest that Greenland populations were the result of colonization from Iceland rather than  
444 from refugial populations in southern North America. In our study, CAN08 had the highest  
445  $H_e$ , which was lower in Iceland than in Greenland (Figures 4b, S9); this result implies that  
446 Icelandic populations were the descendants of colonists from Greenland, which in turn  
447 originated in Canada. The BAS0607 sample from the Baltic Sea had the highest population-  
448 specific  $F_{ST}$  and the lowest heterozygosity values, which suggests that Baltic cod is the

449 newest population. This result agrees with the findings of a previous study, which identified  
450 Baltic cod as an example of a species subject to ongoing selection for reproductive success in  
451 a low salinity environment (Berg et al., 2015).

452

453 The wild poplar data corresponded to our three-directional simulation. Although the samples  
454 used in this study might not cover the whole distribution range of wild poplar, which extends  
455 from southern California to northern Alaska, genome-wide population-specific  $F_{ST}$  values  
456 suggested that wild poplar trees in southern British Columbia (SBC27) and inland British  
457 Columbia (IBC15, 16) are the closest to the ancestral population. The largest population-  
458 specific  $F_{ST}$  value was found in the population with the smallest heterozygosity, SBC22,  
459 which may have resulted from a bottleneck (Geraldes et al., 2014). The wild poplar  
460 expanded in three directions as they adapted to local environments: coastal British Columbia  
461 (SBC; abundant rain), southern Oregon (ORE30; mostly dry summers), and northern British  
462 Columbia (NBC; long periods of daylight) (Figure 6). Changes in environmental factors could  
463 be inferred at the end points of population expansion. To relate SNPs to environmental  
464 changes, functional roles of mutation that underpinned environmental adaptation should be  
465 examined (many may be associated with functional loss).

466

467 Our results from the simulations and three case studies demonstrated that WG population-  
468 specific  $F_{ST}$  values identified the source population and traced the evolutionary history of its  
469 derived population's history based on genetic diversity.

470

471 **4.2 | Genome-wide population-specific  $F_{ST}$  detects key environments that**  
472 **promote adaptation**

473 Our GLS of genome-wide population-specific  $F_{ST}$  values revealed that long daylight hours,  
474 abundant rainfall, and dry summer conditions are the key environmental factors that  
475 influenced the evolution of wild poplar (Table 1). This analysis was conducted because  
476 divergent selection in an environmental gradient can impact genome-wide population  
477 structure (Nosil et al., 2009; Orsini et al., 2013), and prior studies examined geographic  
478 distance and habitat differences between populations as variables that impact population  
479 structure (Bradbury & Bentzen, 2007; Jorde et al., 2015; Kitada et al., 2017). The results  
480 suggested that wild poplar originated from IBC and expanded its distribution to NBC by  
481 adapting to longer day lengths, to SBC seashores adapting to the rainy environment, and to  
482 ORE adapting to dry summer conditions (Figure 6). A previous study on wild poplar revealed  
483 that genes involved in drought response were identified as  $F_{ST}$  outliers along with other genes  
484 related to transcriptional regulation and nutrient uptake (Geraldes et al., 2014), which is a  
485 finding consistent with our GLS results. Our results were also consistent with the  $F_{ST}$  outlier  
486 test of the original study (Geraldes et al., 2014), in which Bayescan (Foll & Gaggiotti, 2008)  
487 revealed that genes involved in circadian rhythm and response to red/far-red light had high  
488 locus-specific global  $F_{ST}$  values. Moreover, the first principal component of SNP allele  
489 frequencies was significantly correlated with day length, and a previous enrichment analysis  
490 for population structuring uncovered genes related to circadian rhythm and photoperiod  
491 (McKown et al., 2014a). Our results were in agreement with the previous findings, which  
492 show the usefulness of using GLS of genome-wide population-specific  $F_{ST}$  to infer  
493 environmental adaptation and population expansion of species.

494

### 495 **4.3 | Properties of $F_{ST}$ moment estimators**

496 Previous studies have suggested or indicated that the “ratio of averages” works better than the

497 “average of ratios” as the number of independent SNPs increases (Cochran, 1977; Weir &  
498 Cockerham, 1984; Weir & Hill, 2002; Bhatia et al., 2013). In regard to the WG population-  
499 specific  $F_{ST}$  estimator, similar results were obtained for the 377 human microsatellite loci  
500 using either the “ratio of averages” or the “average of ratios” (Figure S4). This similar  
501 outcome may have been due to the relatively small variation in the locus-specific global  $F_{ST}$   
502 values (Figure not shown) and the relatively large number of alleles ( $12 \pm 4$ ) of human  
503 microsatellites.

504

505 To explicitly show the underlying mechanism, we used the observed heterozygosity of  
506 population  $i$  ( $\hat{H}_{Si}$ ) as derived in Nei & Chesser (1983) (Supplemental Note). When the number  
507 of loci ( $L$ ) increases, the average observed heterozygosity over all loci converges to its  
508 expected value according to the law of large numbers as

509 
$$\frac{1}{L} \sum_{l=1}^L \left( 1 - \sum_{u=1}^m \tilde{p}_{iu}^2 \right) \rightarrow \frac{1}{L} \sum_{l=1}^L \left( 1 - E \left[ \sum_{u=1}^m \tilde{p}_{iu}^2 \right] \right).$$

510 The observed heterozygosity thus converges to the expected value:

511 
$$\hat{H}_{Si} = \hat{H}_{Si} \left( 1 - \frac{1}{n_i} \right) + \frac{\hat{H}_{0i}}{2n_i} \rightarrow H_{Si} \left( 1 - \frac{1}{n_i} \right) + \frac{H_{0i}}{2n_i}.$$

512 Similarly,  $\hat{H}_S$  and  $\hat{H}_T$  converge to their expected values. This example indicates that the  
513 numerators and denominators of bias-corrected  $F_{ST}$  moment estimators, whether global,  
514 pairwise, or population-specific, converge to their true means and provide unbiased estimates  
515 of  $F_{ST}$  in population genomics analyses with large numbers of SNPs. Our analyses show that  
516 genomic data highlight the usefulness of the bias-corrected moment estimators of traditional  
517  $F_{ST}$  developed in the early 1980s (Nei & Chesser, 1983; Weir & Cockerham, 1984) and  
518 population-specific  $F_{ST}$  (Weir & Goudet, 2017).

519

520 To estimate pairwise  $F_{ST}$ , our previous coalescent simulations based on ms (Hudson, 2002)  
521 showed that NC83 performed best among the present  $F_{ST}$  estimators for cases with 10,000  
522 SNPs (Kitada et al., 2017). Other  $F_{ST}$  moment estimators within an ANOVA framework  
523 produce values approximately double those of true values when used to estimate pairwise  $F_{ST}$ .  
524 NC83 considers a fixed set of population samples; in contrast, the other  $F_{ST}$  moment  
525 estimators consider replicates of a set of populations (Weir & Cockerham, 1984; Holsinger &  
526 Weir, 2009). The models for replicates of population samples were considered to  
527 appropriately estimate global  $F_{ST}$  and/or mean ancestral coefficient, but cause over-estimation  
528 when used to estimate pairwise  $F_{ST}$  (Kitada et al., 2017).

529

530 The WG population-specific  $F_{ST}$  moment estimator measures population genetic diversity  
531 under the framework of relatedness of individuals and identifies the population with the  
532 largest genetic diversity as the ancestral population. This estimator thus works to infer  
533 evolutionary history through genetic diversity. The WG population-specific  $F_{ST}$  estimator is  
534 based on allele matching probabilities, where within-population observed heterozygosity can  
535 be written as  $1 - \tilde{M}_W^i$ . When Hardy–Weinberg equilibrium is assumed ( $\hat{H}_{0i} = \hat{H}_{Si}$ ), the  
536 preceding formula is equivalent to the NC83 unbiased estimator of the gene diversity of  
537 population  $i$  ( $\hat{H}_{Si}$ ) (Supplemental Note):

538 
$$1 - \tilde{M}_W^i = \frac{2n_i}{2n_i - 1} \left( 1 - \sum_{u=1}^m \tilde{p}_{iu}^2 \right) = \hat{H}_{Si} .$$

539 Another variable,  $\tilde{M}^B$ , is “average over pairs of populations of between-population-pair  
540 matching” (Weir & Goudet, 2017).  $\tilde{M}^B$  is the homozygosity over pairs of populations, and  
541 we can write observed heterozygosity over pairs of populations as  $1 - \tilde{M}^B = \hat{H}_B$ .  $\hat{H}_B$  is an  
542 estimator for the denominator of Hudson et al. (1992). When using only allele frequencies, the

543 population-specific  $F_{ST}$  estimator can be written in terms of gene diversity as

544 
$$ps\hat{F}_{ST}^i = \frac{\tilde{M}_w^i - \tilde{M}^B}{1 - \tilde{M}^B} = \frac{\hat{H}_B - \hat{H}_{Si}}{\hat{H}_B} = 1 - \frac{\hat{H}_{Si}}{\hat{H}_B}. \quad (7)$$

545 This formulation is reasonable, because WG population-specific  $F_{ST}$  uses “allele matching,  
546 equivalent to homozygosity and complementary to heterozygosity as used by Nei, rather than  
547 components of variance” (Weir & Goudet, 2017). Weir & Goudet (2017) also gave the  
548 relation between  $E[G_{ST}]$  and their notation  $\theta^B$  and  $\theta^W$  in their Equation 2. In our three case  
549 studies, a linear relationship between  $H_e$  of each population ( $= H_{Si}$ ) and  $ps\hat{F}_{ST}^i$  was evident  
550 (Figure S9), which was exemplified in Equation 7. The coefficient of determination,  $R^2$ , was  
551 0.91 for 51 human populations ( $n = 1,035$ ), 0.993 for 34 Atlantic cod populations ( $n = 1,065$ ),  
552 and 0.82 for 25 wild poplar populations ( $n = 441$ ). The goodness of fit to the linear function  
553 should depend on population sample size (number of individuals).

554

555 In the Atlantic cod case study, CAN08 had the highest  $H_e$  (Figure 4b) and a very large  
556 negative population-specific  $F_{ST}$  value of  $-0.21 \pm 0.019$  compared with the maximum value  
557 of  $0.22 \pm 0.014$  in BAS0607 (Figure S9, Supplemental Data). The Atlantic cod data  
558 corresponded to the two-directional model of our simulations, where the WG population-  
559 specific  $F_{ST}$  value was significantly negative in the ancestral population, whereas  $H_e$  was the  
560 largest (Figure 1). Our consistent results between the simulations and Atlantic cod case study  
561 indicate that, when gene flow from other populations into the source population is limited,  
562 relatively large  $H_e$  ( $\hat{H}_{Si}$ ) is maintained in the source population. In such cases with  $\hat{H}_{Si} >$   
563  $\hat{H}_B$ , Equation 7 produces negative values of population-specific  $F_{ST}$ .

564

#### 565 **4.4 | Shrinkage in Bayesian $F_{ST}$ estimators**



566 We drew the integrated NJ tree with the empirical Bayesian population-specific  $F_{ST}$  values  
567 (Beaumont & Balding, 2004), which showed that the Hazara, Pakistan population was  
568 genetically closest to human ancestors (Figure 7a). Our  $F_{ST}$  map indicated that the Middle  
569 East, Europe, and Central/South Asia were centers of human origin (Figure 7b), which was  
570 consistent with that from the full Bayesian population-specific  $F_{ST}$  estimator (Foll &  
571 Gaggiotti, 2006) and population-specific  $F_{ST}$  estimators (figure not shown). The results  
572 obtained with Bayesian estimators were a consequence of Equation 4, which uses the mean  
573 allele frequency over subpopulations ( $\bar{p}_{lu}$ ) to reduce the number of parameters to be  
574 estimated. The locations of the 51 human populations were as follows: 21 from the Middle  
575 East, Europe, and Central/South Asia, 18 from East Asia, 6 from Africa, 2 from Oceania, and  
576 4 from America. The mean allele frequency ( $\bar{p}_{lu}$ ) reflected the weight of samples from the  
577 Middle East, Europe, and Central/South Asia, thereby resulting in these areas being identified  
578 as centers of origin. Instead of  $\bar{p}_{lu}$ , the full Bayesian method uses allele frequencies in the  
579 ancestral population,  $p_{lu}$ , which are generated from a noninformative Dirichlet prior,  
580  $p_{lu} \sim Dir(1, \dots, 1)$ . Our results indicate that not enough information is available to estimate  
581 allele frequencies in the ancestral population assumed in the models. The shrinkage effect on  
582 allele frequencies in Bayesian inference (Stein, 1956) may shift population-specific  $F_{ST}$   
583 values toward the average of the whole population. Indeed, Bayesian population-specific  $F_{ST}$   
584 values were higher for African populations than WG population-specific  $F_{ST}$  values and close  
585 to those for East Asia (Figures S2). In contrast, because of shrinkage toward mean allele  
586 frequencies, maximum likelihood and Bayesian estimators of locus-specific global  $F_{ST}$   
587 improve the power to detect genes under environmental selection (Beaumont & Balding,  
588 2004). Our empirical Bayes pairwise  $F_{ST}$  estimator ( $EBF_{ST}$ ; Kitada et al., 2007), which is  
589 based on Equation 4, is also useful in cases involving a relatively small number of

590 polymorphic marker loci, such as microsatellites; it performs best by averaging large  
591 sampling variation of allele frequencies in populations with small sample sizes, particularly in  
592 high gene flow scenarios (Kitada et al., 2017). However, this approach suffers from a  
593 shrinkage effect similar to that of Bayesian population-specific  $F_{ST}$  estimators. We note that  
594 the shrinkage effect on allele frequencies can enhance the bias of  $EBF_{ST}$  and other Bayesian  
595  $F_{ST}$  estimators, particularly in genome analyses where large numbers of SNPs are used.

596

## 597 **5 | CONCLUSIONS**

598 WG population-specific  $F_{ST}$  moment estimator identifies the source population and traces the  
599 evolutionary history of its derived population's history based on genetic diversity. In contrast,  
600 NC83 pairwise  $F_{ST}$  moment estimator represents the current population structure. By  
601 integrating estimates from both estimators on NJ trees and maps of sampling locations, we  
602 obtained a picture of current population structure by incorporating evolutionary history. Our  
603 GLS analysis of genome-wide population-specific  $F_{ST}$ , which takes the correlation between  
604 population-specific  $F_{ST}$  values into account, provides insights into how a species has adapted  
605 to key environments and expanded its distribution. Given a large number of loci, bias-  
606 corrected  $F_{ST}$  moment estimators, whether global, pairwise, or population-specific, provide  
607 unbiased estimates of  $F_{ST}$  supported by the law of large numbers. Genomic data highlight the  
608 usefulness of the bias-corrected moment estimators of  $F_{ST}$ . All  $F_{ST}$  moment estimators  
609 described in this paper have reasonable CPU times as implemented in FinePop2 and can also  
610 be used in population genomics studies. Our new practical procedure is expected to have a  
611 wide range of applications, because there are R scripts that can implement our representation  
612 method and simulations of population colonization.

613

614 **ACKNOWLEDGEMENTS**

615 We appreciate the essential comments on the early version by the reviewers, which  
616 significantly improved the manuscript. This study was supported by Japan Society for the  
617 Promotion of Science Grants-in-Aid for Scientific Research KAKENHI nos. 16H02788 and  
618 19H04070 to HK and 18K0578116 to SK.

619

620 **AUTHOR CONTRIBUTIONS**

621 S.K. and H.K. designed the study. R.N. performed simulations. All authors analyzed the data,  
622 and wrote the manuscript and R codes.

623

624 **DATA ACCESSIBILITY STATEMENT**

625 The authors affirm that all data necessary for confirming the conclusions of the article are  
626 present within the article, figures, a table, and supplemental information. The R codes to  
627 perform our representation method and simulations of population colonization are available in  
628 the Supporting Information.

629

630 **ORCID**

631 Shuichi Kitada: <http://orcid.org/0000-0001-5838-0374>

632 Nakamichi Reiichiro: <http://orcid.org/0000-0001-5789-7689>

633 Hirohisa Kishino: <https://orcid.org/0000-0002-3244-359X>

634

635 **REFERENCES**

- 636 Balloux, F., & Lugon - Moulin, N. (2002). The estimation of population differentiation with  
637 microsatellite markers. *Molecular Ecology*, *11*, 155–165.  
638 <https://doi.org/10.1046/j.0962-1083.2001.01436.x>  
639 Beaumont, M. A., & Balding, D. J. (2004). Identifying adaptive genetic divergence among  
640 populations from genome scans. *Molecular Ecology*, *13*, 969–980.

- 641 <https://doi.org/10.1111/j.1365-294X.2004.02125.x>
- 642 Beaumont, M. A. (2005). Adaptation and speciation: what can  $F_{ST}$  tell us? *Trends in Ecology*  
643 *and Evolution*, 20, 435–440. <https://doi.org/10.1016/j.tree.2005.05.017>
- 644 Berg, P. R., Jentoft, S., Star, B., Ring, K. H., Knutsen, H., Lien, S., ... & Andre, C. (2015).  
645 Adaptation to low salinity promotes genomic divergence in Atlantic cod (*Gadus*  
646 *morhua* L.). *Genome Biology and Evolution*, 7, 1644–1663.  
647 <https://doi.org/10.1093/gbe/evv093>
- 648 Berg, P. R., Star, B., Pampoulie, C., Sodeland, M., Barth, J. M., Knutsen, H., ... & Jentoft, S.  
649 (2016). Three chromosomal rearrangements promote genomic divergence between  
650 migratory and stationary ecotypes of Atlantic cod. *Scientific Reports*, 6, 23246.  
651 <https://doi.org/10.1038/srep23246>
- 652 Berg, P. R., Star, B., Pampoulie, C., Bradbury, I. R., Bentzen, P., Hutchings, J. A., ... &  
653 Jakobsen, K. S. (2017). Trans-oceanic genomic divergence of Atlantic cod ecotypes is  
654 associated with large inversions. *Heredity*, 119, 418–428.  
655 <https://doi.org/10.1038/hdy.2017.54>
- 656 Bhatia, G., Patterson, N., Sankararaman, S., & Price, A. L. (2013). Estimating and interpreting  
657  $F_{ST}$ : the impact of rare variants. *Genome Research*, 23, 1514–1521.  
658 <http://www.genome.org/cgi/doi/10.1101/gr.154831.113>
- 659 Bradbury, I. R., & Bentzen, P. (2007). Non-linear genetic isolation by distance: implications  
660 for dispersal estimation in anadromous and marine fish populations. *Marine Ecology*  
661 *Progress Series*, 340, 245–257. doi:10.3354/meps340245
- 662 Buckleton, J., Curran, J., Goudet, J., Taylor, D., Thiery, A., & Weir, B. S. (2016). Population-  
663 specific  $F_{ST}$  values for forensic STR markers: A worldwide survey. *Forensic Science*  
664 *International: Genetics*, 23, 91–100. <https://doi.org/10.1016/j.fsigen.2016.03.004>
- 665 Cann, H. M., De Toma, C., Cazes, L., Legrand, M. F., Morel, V., Piouffre, L., ... & Chen, Z.  
666 (2002). A human genome diversity cell line panel. *Science*, 296, 261–262. DOI:  
667 10.1126/science.296.5566.261b
- 668 Cockran, W. G. (1977). *Sampling Techniques*. New York, USA: Wiley.
- 669 Coop, G., Witonsky, D., Di Rienzo, A., & Pritchard, J. K. (2010). Using environmental  
670 correlations to identify loci underlying local adaptation. *Genetics*, 185, 1411–1423.  
671 <https://doi.org/10.1534/genetics.110.114819>
- 672 Diamond, J. (1997). *Guns, Germs and Steel: The Fates of Human Societies*. London, UK:  
673 Random House.
- 674 Excoffier, L (2001). Analysis of population subdivision, In D. J. Balding, M. Bishop and C.  
675 Cannings (Eds.) *Handbook of Statistical Genetics* (pp. 271–307). Chichester, UK:  
676 Wiley.
- 677 Foll, M., & Gaggiotti, O. E. (2006). Identifying the environmental factors that determine the  
678 genetic structure of populations. *Genetics*, 174, 875–891.  
679 <https://doi.org/10.1534/genetics.106.059451>
- 680 Foll, M., & Gaggiotti, O. E. (2008). A genome-scan method to identify selected loci  
681 appropriate for both dominant and codominant markers: a Bayesian perspective.  
682 *Genetics*, 180, 977–993. <https://doi.org/10.1534/genetics.108.092221>
- 683 Gaggiotti, O. E., & Foll, M. (2010). Quantifying population structure using the F-model.  
684 *Molecular Ecology Resources*, 10, 821–830. [https://doi.org/10.1111/j.1755-](https://doi.org/10.1111/j.1755-0998.2010.02873.x)  
685 [0998.2010.02873.x](https://doi.org/10.1111/j.1755-0998.2010.02873.x)
- 686 Geraldès, A., Pang, J., Thiessen, N., Cezard, T., Moore, R., Zhao, Y., ... & Jones, S. J. (2011).  
687 SNP discovery in black cottonwood (*Populus trichocarpa*) by population transcriptome  
688 resequencing. *Molecular Ecology Resources*, 11, 81–92. <https://doi.org/10.1111/j.1755->

- 689 0998.2010.02960.x
- 690 Geraldès, A., Difazio, S. P., Slavov, G. T., Ranjan, P., Muchero, W., Hannemann, J., ... &  
691 Porth, I. (2013). A 34K SNP genotyping array for *Populus trichocarpa*: design,  
692 application to the study of natural populations and transferability to other *Populus*  
693 species. *Molecular Ecology Resources*, *13*, 306–323. [https://doi.org/10.1111/1755-](https://doi.org/10.1111/1755-0998.12056)  
694 [0998.12056](https://doi.org/10.1111/1755-0998.12056)
- 695 Geraldès, A., Farzaneh, N., Grassa, C. J., McKown, A. D., Guy, R. D., Mansfield, S. D., ... &  
696 Cronk, Q. C. (2014). Landscape genomics of *Populus trichocarpa*: the role of  
697 hybridization, limited gene flow, and natural selection in shaping patterns of population  
698 structure. *Evolution*, *68*, 3260–3280. <https://doi.org/10.1111/evo.12497>
- 699 Hemmer - Hansen, J., Nielsen, E. E., Therkildsen, N. O., Taylor, M. I., Ogden, R., Geffen, A.  
700 J., ... & FishPopTrace Consortium. (2013). A genomic island linked to ecotype  
701 divergence in Atlantic cod. *Molecular Ecology*, *22*, 2653–2667.  
702 <https://doi.org/10.1111/mec.12284>
- 703 Hemmer - Hansen, J., Nielsen, E. E., Therkildsen, N. O., Taylor, M. I., Ogden, R., Geffen, A.  
704 J., ... & FishPopTrace Consortium. (2013). A genomic island linked to ecotype  
705 divergence in Atlantic cod, Dryad, Dataset, <https://doi.org/10.5061/dryad.9gf10>
- 706 Holsinger, K.E., & Weir, B. S. (2009). Genetics in geographically structured populations:  
707 defining, estimating and interpreting  $F_{ST}$ . *Nature Reviews Genetics*, *9*, 639–650.  
708 <https://doi.org/10.1038/nrg2611>
- 709 Hudson, R. R. (2002). Generating samples under a Wright–Fisher neutral model of genetic  
710 variation. *Bioinformatics*, *18*, 337–338. <https://doi.org/10.1093/bioinformatics/18.2.337>
- 711 Hudson, R. R., Slatkin, M., & Maddison, W. P. (1992). Estimation of levels of gene flow from  
712 DNA sequence data. *Genetics*, *132*, 583–589.
- 713 Jorde, P. E., Søvik, G., Westgaard, J. I., Albrechtsen, J., André, C., Hvingel, C., ... & Jørstad, K.  
714 E. (2015). Genetically distinct populations of northern shrimp, *Pandalus borealis*, in the  
715 North Atlantic: adaptation to different temperatures as an isolation factor. *Molecular*  
716 *Ecology*, *24*, 1742–1757. <https://doi.org/10.1111/mec.13158>
- 717 Kitada, S., Kitakado, T., & Kishino, H. (2007). Empirical Bayes inference of pairwise  $F_{ST}$  and  
718 its distribution in the genome. *Genetics*, *177*, 861–873.  
719 <https://doi.org/10.1534/genetics.107.077263>
- 720 Kitada, S., Nakamichi, R., & Kishino, H. (2017). The empirical Bayes estimators of fine-scale  
721 population structure in high gene flow species. *Molecular Ecology Resources*, *17*,  
722 1210–1222. <https://doi.org/10.1111/1755-0998.12663>
- 723 Liu, H., Prugnolle, F., Manica, A., & Balloux, F. (2006). A geographically explicit genetic  
724 model of worldwide human-settlement history. *The American Journal of Human*  
725 *Genetics*, *79*, 230–237. <https://doi.org/10.1086/505436>
- 726 McKown, A. D., Guy, R. D., Klápště, J., Geraldès, A., Friedmann, M., Cronk, Q. C., ... &  
727 Douglas, C. J. (2014a). Geographical and environmental gradients shape phenotypic  
728 trait variation and genetic structure in *Populus trichocarpa*. *New Phytologist*, *201*,  
729 1263–1276. <https://doi.org/10.1111/nph.12601>
- 730 McKown, A. D., Klápště, J., Guy, R. D., Geraldès, A., Porth, I., Hannemann, J., ... & Cronk,  
731 Q. C. (2014b). Genome-wide association implicates numerous genes underlying  
732 ecological trait variation in natural populations of *Populus trichocarpa*. *New*  
733 *Phytologist*, *203*, 535–553. <https://doi.org/10.1111/nph.12815>
- 734 McKown, A. D., Guy, R. D., Quamme, L., Klápště, J., La Mantia, J., Constabel, C. P., ... &  
735 Azam, M. S. (2014c). Association genetics, geography and ecophysiology link stomatal  
736 patterning in *Populus trichocarpa* with carbon gain and disease resistance trade-offs.



- 737 *Molecular Ecology*, 23, 5771–5790. <https://doi.org/10.1111/mec.12969>
- 738 Nei, M. (1973). Analysis of gene diversity in subdivided populations. *Proceedings of the*  
739 *National Academy of Sciences*, 70, 3321–3323. <https://doi.org/10.1073/pnas.70.12.3321>
- 740 Nei, M. (1977). *F* - statistics and analysis of gene diversity in subdivided populations. *Annals*  
741 *of Human Genetics*, 41, 225–233. <https://doi.org/10.1111/j.1469-1809.1977.tb01918.x>
- 742 Nei, M., & Chesser, R. K. (1983). Estimation of fixation indices and gene diversities. *Annals*  
743 *of Human Genetics*, 47, 253–259. <https://doi.org/10.1111/j.1469-1809.1983.tb00993.x>
- 744 Nielsen, R., Akey, J. M., Jakobsson, M., Pritchard, J. K., Tishkoff, S., & Willerslev, E. (2017).  
745 Tracing the peopling of the world through genomics. *Nature*, 541, 302–310.  
746 doi:10.1038/nature21347
- 747 Nosil, P., Funk, D. J., & Ortiz - Barrientos, D. (2009). Divergent selection and heterogeneous  
748 genomic divergence. *Molecular Ecology*, 18, 375–402. [https://doi.org/10.1111/j.1365-](https://doi.org/10.1111/j.1365-294X.2008.03946.x)  
749 [294X.2008.03946.x](https://doi.org/10.1111/j.1365-294X.2008.03946.x)
- 750 Orsini, L., Vanoverbeke, J., Swillen, I., Mergeay, J., & De Meester, L. (2013). Drivers of  
751 population genetic differentiation in the wild: isolation by dispersal limitation,  
752 isolation by adaptation and isolation by colonization. *Molecular Ecology*, 22, 5983–  
753 5999. <https://doi.org/10.1111/mec.12561>
- 754 Ramachandran, S., Deshpande, O., Roseman, C. C., Rosenberg, N. A., Feldman, M. W., &  
755 Cavalli-Sforza, L. L. (2005). Support from the relationship of genetic and geographic  
756 distance in human populations for a serial founder effect originating in Africa.  
757 *Proceedings of the National Academy of Sciences*, 102, 15942–15947.  
758 <https://doi.org/10.1073/pnas.0507611102>
- 759 Raymond, M., & Rousset, F. (1995). GENEPOP (version 1.2): population genetics software  
760 for exact tests and ecumenicism. *Journal of Heredity*, 86, 248–249.
- 761 Rosenberg, N. A., J. K. Pritchard, J. L. Weber, H. M. Cann, K. K. Kidd, L. A. Zhivotovsky,  
762 and M. W. Feldman, 2002 Genetic structure of human populations. *Science* 298: 2381–  
763 2385. DOI: 10.1126/science.1078311
- 764 Rousset, F. (2001). Inferences from spatial population genetics, In D. J. Balding, M. Bishop  
765 and C. Cannings (Eds.) *Handbook of Statistical Genetics* (pp. 239–269). Chichester,  
766 UK: Wiley.
- 767 Rousset, F., (2004). *Genetic Structure and Selection in Subdivided Populations*. Princeton,  
768 USA: Princeton University Press.
- 769 Rousset, F. (2008). Genepop'007: a complete reimplement of the Genepop software for  
770 Windows and Linux. *Molecular Ecology Resources*, 8, 103–106.  
771 <https://doi.org/10.1111/j.1471-8286.2007.01931.x>
- 772 Rutherford, A. (2016). *A Brief History of Everyone Who Ever Lived: The Human Story Retold*  
773 *Through Our Genes*. New York, USA: The Experiment.
- 774 Saitou, N., & Nei, M. (1987). The neighbor-joining method: a new method for reconstructing  
775 phylogenetic trees. *Molecular Biology and Evolution*, 4, 406–425.  
776 <https://doi.org/10.1093/oxfordjournals.molbev.a040454>
- 777 Stein, C. (1956). Inadmissibility of the usual estimator for the mean of a multivariate  
778 distribution, In *Proceedings of the Third Berkeley Symposium on Mathematical*  
779 *Statistics and Probability Vol. 1* (pp. 197–206). Berkeley, USA: University of California  
780 Press.
- 781 Therkildsen, N. O., Hemmer - Hansen, J., Hedeholm, R. B., Wisz, M. S., Pampoulie, C.,  
782 Meldrup, D., ... & Nielsen, E. E. (2013). Spatiotemporal SNP analysis reveals  
783 pronounced biocomplexity at the northern range margin of Atlantic cod *Gadus morhua*.  
784 *Evolutionary Applications*, 6, 690–705. <https://doi.org/10.1111/eva.12055>

- 785 Therkildsen, N. O., Hemmer - Hansen, J., Hedeholm, R. B., Wisz, M. S., Pampoulie, C.,  
786 Meldrup, D., ... & Nielsen, E. E. (2013). Spatiotemporal SNP analysis reveals  
787 pronounced biocomplexity at the northern range margin of Atlantic cod *Gadus morhua.*,  
788 v2, Dryad, Dataset, <https://doi.org/10.5061/dryad.rd250>  
789 Weir, B. S., & Cockerham, C. C. (1984). Estimating  $F$ -statistics for the analysis of population  
790 structure. *Evolution*, 38, 1358–1370.  
791 Weir, B. S., & Hill, W. G. (2002). Estimating  $F$ -statistics. *Annual Review of Genetics*, 36,  
792 721–750. <https://doi.org/10.1146/annurev.genet.36.050802.093940>  
793 Weir, B. S., & Goudet, J. (2017). A unified characterization of population structure and  
794 relatedness. *Genetics*, 206, 2085–2103. <https://doi.org/10.1534/genetics.116.198424>  
795 Wright, S. (1931). Evolution in Mendelian populations. *Genetics*, 16, 97–159.  
796 Wright, S. (1951). The genetical structure of populations. *Annals of Eugenics*, 15, 323–354.  
797 <https://doi.org/10.1111/j.1469-1809.1949.tb02451.x>  
798

## 799 **SUPPORTING INFORMATION**

800 Additional Supporting Information may be found in the Supporting Information section at the  
801 end of the article.

802

**Table 1** Regression of genome-wide population-specific  $F_{ST}$  of 25 wild poplar populations on the environmental variables

| Variables | Estimate | SE     | Z     | $p$     |
|-----------|----------|--------|-------|---------|
| DAY       | 0.0489   | 0.0164 | 2.99  | 0.003** |
| MAT       | -0.0088  | 0.0086 | -1.03 | 0.305   |
| MAP       | 0.0001   | 0.0000 | 2.79  | 0.005** |
| SHM       | 0.0022   | 0.0009 | 2.38  | 0.018*  |

803 DAY; longest day length (hours),  
804 MAT; mean annual temperature (°C),  
805 MAP; mean annual precipitation (mm),  
806 SHM; summer heat-moisture index,  
807 \* $p < 0.05$  and \*\* $p < 0.01$



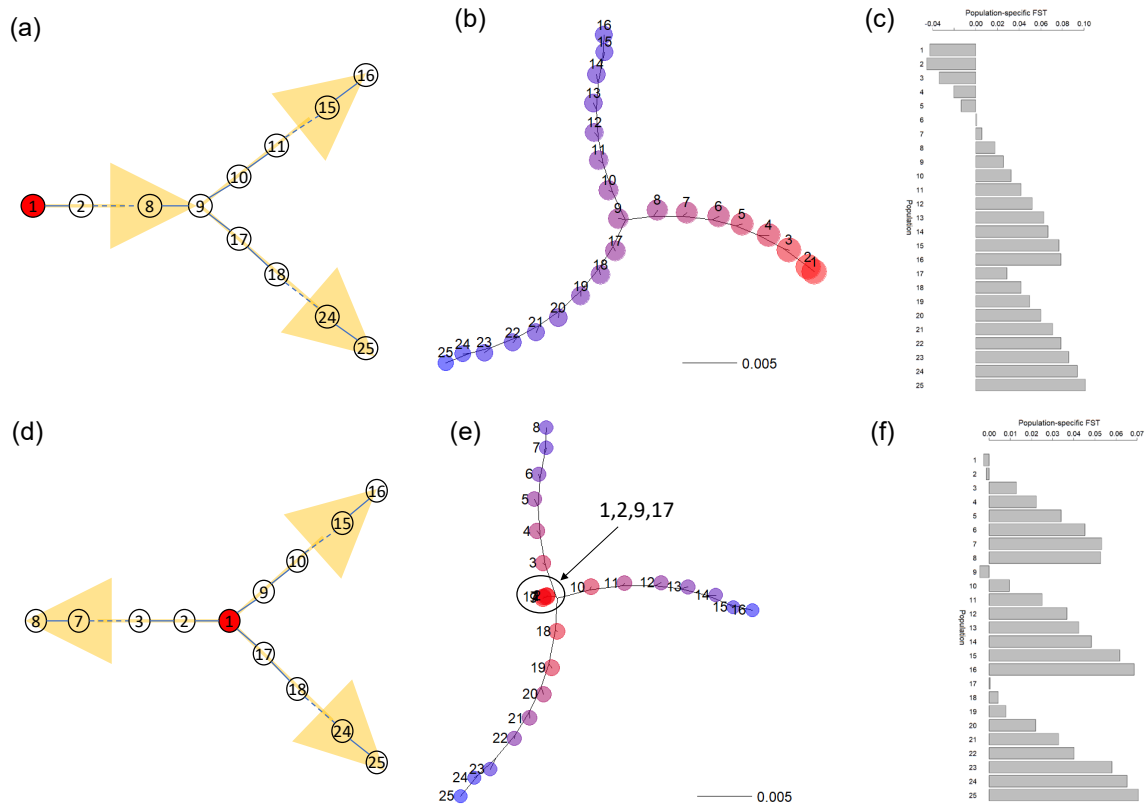

808  
 809 **FIGURE 1** Results from simulations of population colonization. (a) Two- and (d)  
 810 three-directional colonization models. Population 1 in red is ancestral, and arrows  
 811 show the direction of colonization. Neighbor-joining unrooted trees based on pairwise  
 812  $F_{ST}$  distance matrix overlaid with population-specific  $F_{ST}$  values for the (b) two- and  
 813 (e) three-directional models. The color of each population shows the magnitude of  
 814 population-specific  $F_{ST}$  values. The radius of each population is proportional to the  
 815 level of  $H_e$ , as visualized by  $(H_e \times 10)^3$ . Population-specific  $F_{ST}$  values for 25  
 816 simulated populations are presented for the (c) two- and (f) three-directional models.

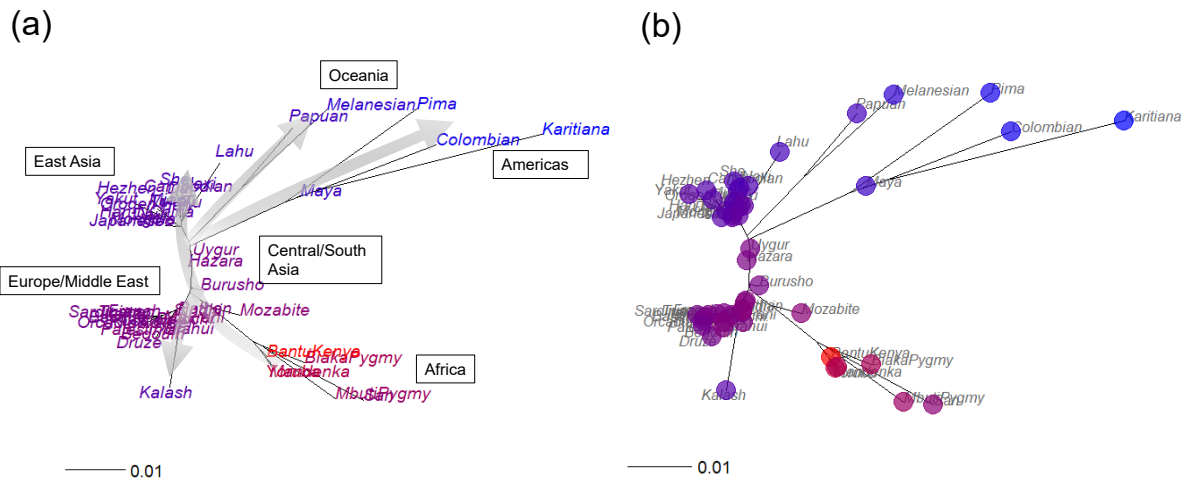

817

818

819 **FIGURE 2** Population structure of 51 human populations ( $n = 1,035$ ; 377  
820 microsatellites). The unrooted NJ tree based on pairwise  $F_{ST}$  overlaid with  
821 population-specific  $F_{ST}$  values on (a) population labels and (b) population nodes. The  
822 arrows show inferred routes of population range expansion. The color of each  
823 population shows the magnitude of population-specific  $F_{ST}$  values. Data from  
824 Rosenberg *et al.* (2002).

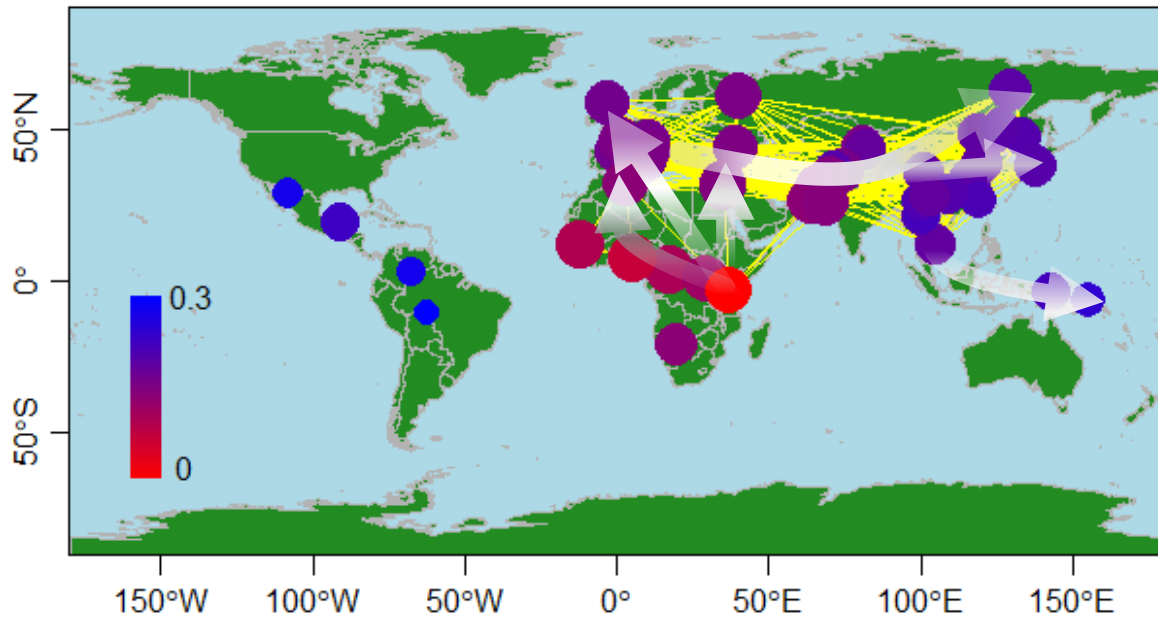

825  
826  
827  
828  
829  
830  
831

**FIGURE 3** Map of the population structure of 51 human populations. The color of each population shows the magnitude of population-specific  $F_{ST}$  values. Populations connected by yellow lines are those with pairwise  $F_{ST} < 0.01$ . The radius of each sampling point is proportional to the level of  $H_e$  as visualized by  $H_e^{12}$ . The arrows show inferred routes of population expansion. Data from Rosenberg et al. (2002).

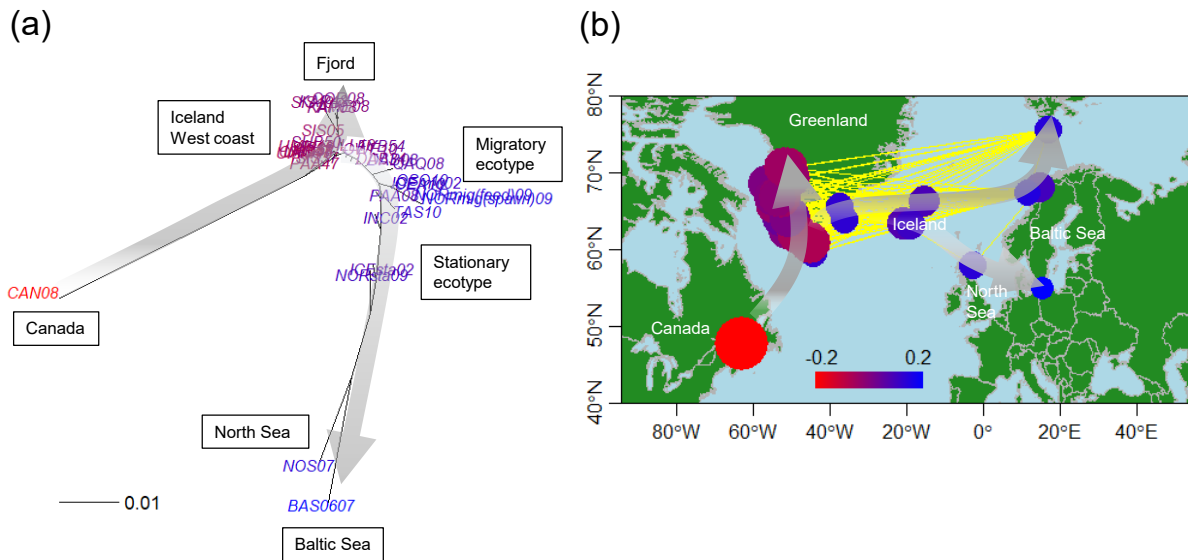

832  
833

834 **FIGURE 4** Population structure of 34 geographical samples of wild Atlantic cod ( $n =$   
835 1,065; 921 SNPs). (a) Unrooted NJ tree based on pairwise  $F_{ST}$  and population-  
836 specific  $F_{ST}$  values. (b) Map of the population structure of the Atlantic cod  
837 populations. The color of each population shows the magnitude of population-specific  
838  $F_{ST}$  values. Populations connected by yellow lines are those with pairwise  $F_{ST} < 0.04$ .  
839 The radius of each sampling point is proportional to the level of heterozygosity ( $H_e$ )  
840 as visualized by  $H_e^{100}$ . The arrows show inferred routes of population expansion.  
841 Data are combined from Therkildsen *et al.* (2013) and Hemmer-Hansen *et al.* (2013).

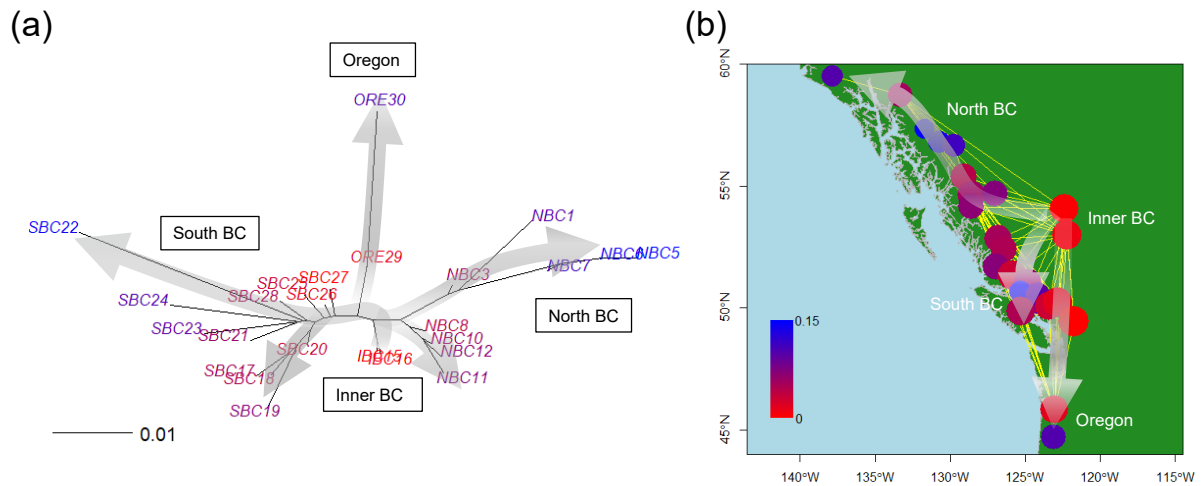

842  
843  
844  
845  
846  
847  
848  
849  
850  
851  
852

**FIGURE 5** Population structure for 25 geographical samples of wild poplar ( $n = 441$ ; 29,355 SNPs). (a) Unrooted NJ tree based on pairwise  $F_{ST}$  overlaid with population-specific  $F_{ST}$  values. (b) Map of the population structure of the wild poplar populations. The color of each population shows the magnitude of population-specific  $F_{ST}$  values. Populations connected by yellow lines are those with pairwise  $F_{ST} < 0.02$ . The radius of each sampling point is proportional to the level of heterozygosity ( $H_e$ ) as visualized by  $H_e^{100}$ . The arrows show inferred routes of population expansion. Data from McKown et al. (2014b).

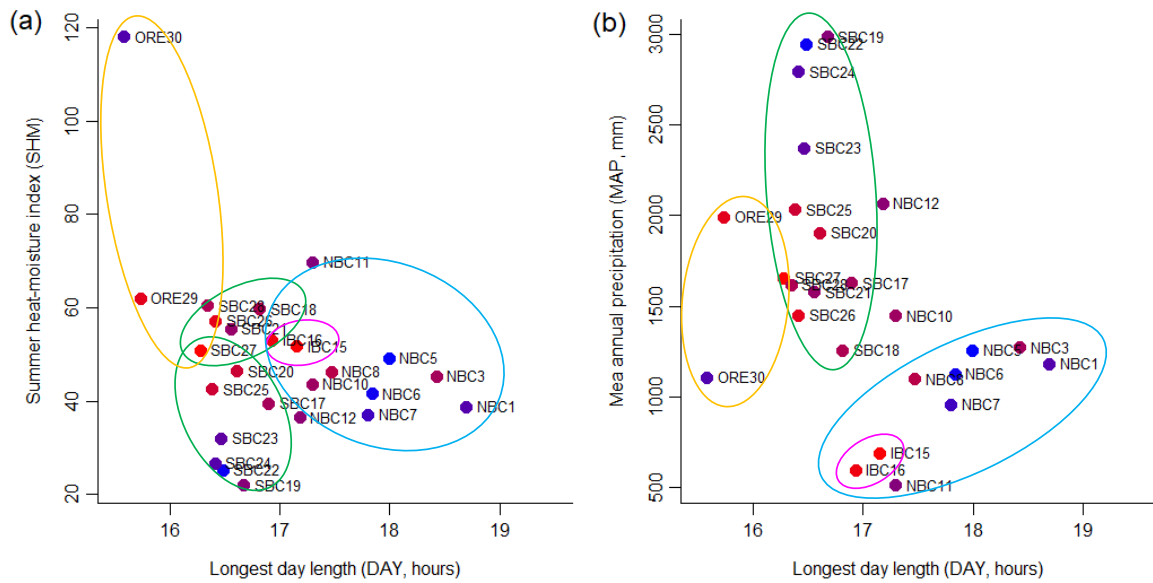

853  
854  
855  
856  
857  
858  
859  
860

**FIGURE 6** Population range expansion and environmental adaptation. Longest day length vs. (a) summer heat-moisture index and (b) mean annual precipitation for 25 geographical samples of wild poplar. The color of each population shows the magnitude of population-specific  $F_{ST}$  values. The circles show inferred population expansion from IBC15, IBC16, and SBC27. The color of the circles refers to the population clusters (see, Figure S6).

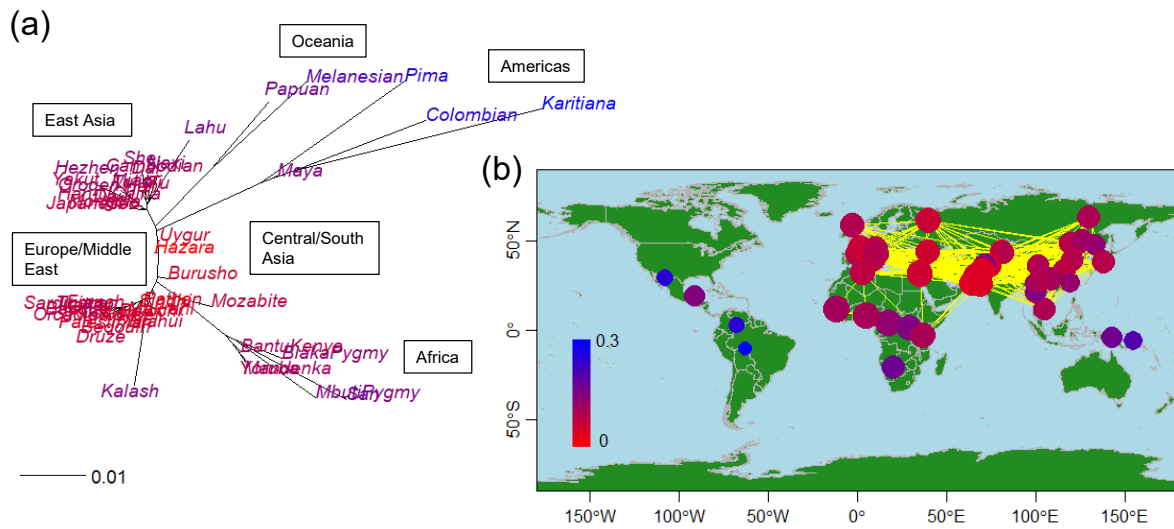

861  
862  
863  
864  
865  
866  
867  
868  
869

**FIGURE 7** Population structure of 51 human populations inferred based on Bayesian population-specific  $F_{ST}$  values. (a) Unrooted NJ tree based on pairwise  $F_{ST}$  overlaid with population-specific  $F_{ST}$  values. (b) Map of the population structure. The color of each population shows the magnitude of Bayesian population-specific  $F_{ST}$  values. Populations connected by yellow lines are those with pairwise  $F_{ST} < 0.01$ . The radius of each sampling point is proportional to the level of  $H_e$  as visualized by  $H_e^{12}$ . Data from Rosenberg et al. (2002).
